1 Clinical factors affecting evoked magnetic fields in patients with Parkinson's disease

2 Short title: Evoked magnetic fields in Parkinson's disease

3 Ryoji Naganuma<sup>1</sup>, Ichiro Yabe<sup>1\*</sup>, Megumi Takeuchi<sup>1</sup>, Kirari Morishita<sup>2</sup>, Shingo Nakane<sup>3</sup>, Ryoken

4 Takase<sup>4,5</sup>, Ikuko Takahashi-Iwata<sup>1</sup>, Masaaki Matsushima<sup>1</sup>, Mika Otsuki<sup>1</sup>, Hideaki Shiraishi<sup>6</sup>, Hidenao

5 Sasaki<sup>1</sup>

6

7 <sup>1</sup> Department of Neurology, Faculty of Medicine and Graduate School of Medicine, Hokkaido

8 University, Sapporo, Hokkaido, Japan.

9 <sup>2</sup> Division of Laboratory and Transfusion Medicine, Hokkaido University Hospital, Sapporo,

10 Hokkaido, Japan.

11 <sup>3</sup> Division of Magnetoencephalography, Hokkaido University Hospital, Sapporo, Hokkaido, Japan.

12 <sup>4</sup> Faculty of Health Sciences/Graduate School of Health Sciences/Department of Health Sciences,

13 School of Medicine, Hokkaido University, Sapporo, Hokkaido, Japan.

14 <sup>5</sup> Department of Radiation Technology, Sapporo City General Hospital, Sapporo, Hokkaido, Japan

15 <sup>6</sup> Department of Pediatrics, Hokkaido University Hospital, Sapporo, Hokkaido, Japan.

16

17 \*Corresponding author

18 E-mail: [yabe@med.hokudai.ac.jp](mailto:yabe@med.hokudai.ac.jp) (IY)

19

- 20 Author Contributions
- 21 RN: Conceptualization, Formal Analysis, Investigation, Writing – Original Draft Preparation
- 22 IY: Data Curation, Funding Acquisition, Methodology, Project Administration, Writing – Review &
- 23 Editing
- 24 MT: Investigation
- 25 KM: Investigation
- 26 SN: Investigation
- 27 RT: Investigation
- 28 II: Supervision, Writing – Review & Editing
- 29 MM: Supervision, Writing – Review & Editing
- 30 MO: Methodology, Supervision
- 31 HSh: Conceptualization, Methodology, Supervision
- 32 HSa: Conceptualization, Methodology, Project Administration
- 33
- 34

## 35 **Abstract**

36 Studies on evoked responses in Parkinson's disease (PD) may be useful for elucidating the etiology  
37 and quantitative evaluation of PD. However, in previous studies, the association between evoked  
38 responses and detailed motor symptoms or cognitive functions has not been clear. This study  
39 investigated the characteristics of the visual (VEF), auditory (AEF), and somatosensory (SEF) evoked  
40 magnetic fields in patients with Parkinson's disease (PD), and the correlations between evoked fields  
41 and the patient's clinical characteristics, motor symptoms, and cognitive functions. Twenty patients  
42 with PD and 10 healthy controls (HCs) were recruited as participants. We recorded VEF, AEF, and  
43 SEF, collected clinical characteristics, performed physical examinations, and administered 10  
44 cognitive tests. We investigated differences in the latencies of the evoked fields between patients with  
45 PD and HCs. We also evaluated the correlation of the latencies with motor symptoms and cognitive  
46 functioning. There were significant differences between the two groups in 6 of the cognitive tests, all  
47 of which suggested mild cognitive impairment in patients with PD. The latencies of the VEF N75m,  
48 P100m, N145m, AEF P50m, P100m, and SEF P60m components were greater in the patients with PD  
49 than in the HCs. The latencies mainly correlated with medication and motor symptoms, less so with  
50 cognitive tests, with some elements of the correlations remaining significant after Bonferroni  
51 correction. In conclusion, the latencies of the VEF, AEF, and SEF were greater in PD patients than in  
52 HCs and were mainly correlated with medication and motor symptoms rather than cognitive  
53 functioning. Findings from this study suggest that evoked fields may reflect basal ganglia functioning

54 and are candidates for assessing motor symptoms or the therapeutic effects of medication in patients

55 with PD.

## 56 **Introduction**

57           Various cognitive deficits develop during the course of Parkinson's disease (PD). Many  
58 types of cognitive deficits can be indicative of neurodegeneration of the cerebral cortex [1]. Evoked  
59 responses are electrophysiological recordings that reflect the functioning of sensory pathways in the  
60 corresponding part of the cerebral cortex of the stimulated modality, and are widely used in clinical  
61 contexts. If cerebral cortex dysfunction can be reflected in evoked responses, these responses may be  
62 useful for the quantitative evaluation of PD and in elucidating PD's pathophysiology. Moreover,  
63 knowledge of evoked responses in PD may help in the development of novel diagnostic procedures,  
64 assessments of medication, and treatment systems for PD. Thus far, an increase in the latency of the  
65 P100 component of the visually evoked potential (VEP) [2], a decrease in the amplitude of the N30  
66 component of the somatosensory evoked potential (SEP) [3], and an increase in the latency of wave V  
67 of the auditory brainstem response [4] have been reported in PD. Several clinical characteristics and  
68 measures, such as disease duration [5], and scores on the Unified PD Rating Scale (UPDRS) [6-9] and  
69 the Mini-Mental State Examination (MMSE) [10-13], have been assessed as possible factors related  
70 to these electrophysiological abnormalities, but no consistent associations have been identified.

71           In this study, we hypothesized that 1) the latencies of the visual (VEF), auditory (AEF), and  
72 somatosensory (SEF) evoked magnetic fields would be increased in patients with PD; 2) the latencies  
73 would correlate with clinical characteristics, such as disease stage, patients' demographics, or specific  
74 motor symptoms; and 3) the latencies would correlate with cognitive tests that share the same sensory

75 modality (e.g., auditory tasks and AEF, visual tasks and VEF). We tested these hypotheses by using  
76 magnetoencephalography (MEG) as a precursor to consider signal source estimation and brain  
77 network analysis in future studies.

78

## 79 **Methods**

### 80 **Participants**

81 Twenty patients with PD who were admitted to the Department of Neurology, Hokkaido  
82 University Hospital, Sapporo, Japan, between July 2017 and March 2019, were recruited for this  
83 study. The diagnosis of PD was confirmed according to the MDS clinical diagnostic criteria for  
84 Parkinson's disease [14]. Ten age-matched healthy controls (HCs) were also recruited by posters in  
85 the hospital and calls to our acquaintances.

86 The exclusion criteria for both groups included blindness, deafness, or loss of hand sensation due to  
87 sensory organ or brain disorder; an obvious history of brain disease, such as epilepsy, cerebral  
88 infarction, or brain surgery; and/or internal metal, such as cardiac pacemakers or deep brain  
89 stimulation systems.

90 The Hokkaido University Hospital Institutional Review Board approved this study. All  
91 participants received detailed information regarding their participation, fully understood the  
92 explanation, freely agreed to participate, and provided written, informed consent before participation.

93

## 94 **Clinical characteristics and measures**

95           A modified Hoehn–Yahr classification [15] and UPDRS (1987 version) were used to assess  
96 the severity of PD in the patients. Physical examinations were conducted by well-trained neurologists,  
97 and cognitive tests (described below) were conducted by a clinical psychologist.

98 All participants underwent a series of 10 tasks to evaluate cognitive functioning. These included the  
99 MMSE; the Frontal Assessment Battery (FAB) [16]; the noise pareidolia test [17]; the Japanese  
100 version of the Montreal cognitive assessment (MoCA-J) [18]; part of the Clinical Assessment for  
101 Attention (CAT) [19] (digit span, tapping span, auditory detection task [ADT], visual cancellation  
102 task [VCT], and paced auditory serial addition task with 3 s intervals); the Trail Making Test (TMT)  
103 A and B [20]; part of the Wechsler Adult Intelligence Scale (WAIS) III [21] (block design); part of  
104 the Visual Perception Test for Agnosia (VPTA) [22] (picture naming, symbol recognition, character  
105 recognition, famous person naming, facial expression recognition, line bisection task, Albert’s test,  
106 and copying [so-called double daisy]); Raven’s Colored Progressive Matrices [23]; and the standard  
107 verbal paired-associate learning test [24].

108

## 109 **Medications**

110           For the modified Hoehn–Yahr classification, cognitive tests, UPDRS, and MEG recording,  
111 the patients were administered multiple anti-PD drugs, per usual, and the tests were conducted during  
112 the on-state, avoiding the off-state. The participants who were inpatients (N = 8) stopped medication

113 for over 12 hours and the UPDRS Part 3 was evaluated again in the off-state.

114

## 115 **MEG data collection**

116 MEG data were collected with an Elekta/Neuromag Vectorview 306-channel whole-head  
117 neuromagnetometer (Elekta AB, Sweden). In the somatosensory condition, constant current electrical  
118 stimulation of 0.2 ms in duration was applied to a unilateral median nerve at 3 Hz and alternated  
119 between the right and the left side. Stimulus intensity was set at the supra-motor-threshold. The SEF  
120 was recorded 300 times from the whole-head and then averaged.

121 In the auditory condition, auditory stimuli generated by the STIM program (Compumedics,  
122 Abbotsford, VA, Australia) were delivered from a small speaker in a shielded room and guided to a  
123 unilateral ear through an air tube. The auditory stimulus was a 2000 Hz tone burst, with a volume of  
124 100 dB sound pressure level at the speaker (99 dB at the ear), a duration of 150 ms, with a 30 ms  
125 Hanning window, and was applied to a unilateral ear and alternated between the right and the left side.  
126 The AEF was recorded 100 times from the whole-head and then averaged.

127 In the visual condition, visual stimuli were projected, using an LCD projector outside of the  
128 shielded room, onto a screen 45 cm in front of the participant's face, stimulating the unilateral visual  
129 hemifield and alternated between the right and the left side. The visual stimulus generated by STIM  
130 was a checkerboard pattern with a reversal rate of 2 Hz. The stimulus was a 13 cm<sup>2</sup> square that  
131 subtended a visual angle of 16.6°, with an average luminance of 27 cd/m<sup>2</sup> and a contrast of 63.0%.



132 The VEF was recorded 300 times from the whole-head and then averaged. Each participant was  
133 monitored on a video monitor and alerted when distracted or drowsy.

134

## 135 **Signal processing**

136 When describing an evoked field below, the stimulation side is indicated by an upper-case  
137 letter in parentheses after the name of the evoked field. In addition, since AEF was recorded from  
138 both hemispheres, “c” and “i” are added for the AEF recorded from the contralateral and the  
139 ipsilateral hemisphere, respectively, to the stimulation side. For instance, AEF P50m stimulated from  
140 the left ear and recorded from the right hemisphere is indicated as AEF P50m (Lc).

141 A 40 Hz low-pass filter was applied to the VEF data. Similarly, a 30 Hz low-pass and a 4 Hz  
142 high-pass filter were applied to the AEF data, and a 100 Hz low-pass and 0.5 Hz high-pass filter were  
143 applied to the SEF data using the xplotter program (Neuromag, Helsinki, Finland). After noise  
144 processing, the data were exported as .csv files. We calculated the root mean square of the  
145 gradiometer pairs within each channel and plotted these as graphs. We quantified the latencies of the  
146 evoked fields based on the maximum root mean square peak.

147

## 148 **Statistical analyses**

149 We used JMP ver. 14.0 (SAS Institute, USA) for statistical analyses. When comparing  
150 between groups, we used Welch’s *t*-test for continuous variables and Wilcoxon signed-rank test for

151 ordinal variables. P-values  $< 0.05$  were considered statistically significant. Descriptive statistics of  
152 continuous variables are reported as *mean  $\pm$  standard deviation* and ordinal variables are reported as  
153 *median (interquartile range)*. When evaluating the association between the evoked field responses  
154 and clinical characteristics or measures, we used the Pearson correlation coefficient for continuous  
155 variables and Spearman's rank correlation coefficient for ordinal variables. Results were considered  
156 statistically significant if  $|R|$  or  $|r_s| > 0.6$ , and  $p < 0.05$ . If only one or two scores were obtained on any  
157 of the clinical measures that were on an ordinal scale, we excluded them from the statistical analysis.  
158 The Bonferroni correction was also performed to evaluate the correlation.

159

## 160 **Results**

### 161 **Participants and clinical characteristics**

162 There were 13 male and seven female patients with a mean age of  $66.9 \pm 7.5$  years, while  
163 the HCs included five men and five women with a mean age was  $63.1 \pm 5.9$  years. There was no  
164 significant difference in age between the two groups. The average disease duration was  $12 \pm 5.2$  years  
165 and the median modified Hoehn–Yahr stage was 3 [2.5–3]. Details of the medications that patients  
166 were taking are described in S1 Table. The levodopa equivalent dose, calculated based on a report by  
167 Tomlinson et al. [25], was  $860.2 \pm 500.9$  mg.

168

### 169 **Clinical measures**

170 In order to assess laterality effects, patients' left and right sides were also designated as the  
171 severe side (S) and the mild side (M), based on the UPDRS Part 3 evaluation. Referring to UPDRS  
172 Part 3, we compared the total scores of the left upper and lower limbs and that of the right upper and  
173 lower limbs. We defined the side with the higher score as S and the side with the lower score as M. If  
174 both total scores were equal, we referred to the patient's medical history and defined the side that first  
175 developed symptoms as S and the opposite side as M. When comparing patients' S or M with those of  
176 HCs, we used the average of the left and right sides in the HCs as the counterparts of the patients' S  
177 and M, respectively. The results of the UPDRS are shown in S2 Table. In addition to the usual  
178 UPDRS evaluation, eight patients underwent UPDRS Part 3 in the off-state.

179 Eighty scores were obtained from the 10 cognitive tests. The results of the cognitive tests  
180 that yielded significant differences between PD and HCs are shown in Table 1. For the CAT  
181 assessment, two patients were excluded from the analysis because they could not perform the ADT or  
182 the paced auditory serial addition task due to not being able to understand the voice on the recording  
183 that is used to administer each of those tasks.

184

185 **Table 1. Results of the cognitive tests that were significantly different between patients with**  
186 **Parkinson's disease and healthy control participants.**

|  | <b>Patients</b> | <b>Controls</b> | <b>p</b> |
|--|-----------------|-----------------|----------|
|--|-----------------|-----------------|----------|

|                                          |                |                  |        |
|------------------------------------------|----------------|------------------|--------|
| <b>FAB<sup>1</sup></b>                   | 14 [12.0-15.0] | 17.5 [16.3-18]   | <0.001 |
| Lexical fluency                          | 2 [2.0-3.0]    | 3 [3-3]          | 0.045  |
| Motor series                             | 3 [0.0-3.0]    | 3 [3-3]          | 0.025  |
| Go/No-Go                                 | 0.5 [0.0-3.0]  | 3 [3-3]          | 0.043  |
| <b>MoCA-J<sup>2</sup></b>                | 23 [21.8-24.0] | 25.5 [23.3-27.5] | 0.029  |
| Language [fluency]                       | 0 [0.0-1.0]    | 1 [1-1]          | 0.044  |
| Abstraction                              | 1 [0.0-1.0]    | 2 [1.3-2]        | <0.001 |
| Delayed recall                           | 1.5 [0.0-2.0]  | 3 [1.5-4.5]      | 0.036  |
| <b>CAT<sup>3</sup></b>                   |                |                  |        |
| Tapping span (order)                     | 6 [5.0-7.0]    | 7 [7-8]          | 0.014  |
| VCT <sup>4</sup> simple symbol time (s)  | 56.5 ± 15.3    | 39.8 ± 8.1       | <0.001 |
| VCT simple symbol hit rate (%)           | 99.7 ± 0.7     | 100.0 ± 0.0      | 0.042  |
| VCT complex symbol time (s)              | 73.7 ± 24.6    | 44.8 ± 6.4       | <0.001 |
| VCT complex symbol hit rate (%)          | 99.4 ± 1.3     | 100.0 ± 0.0      | 0.045  |
| VCT number time (s)                      | 105.8 ± 22.7   | 77.9 ± 12.8      | <0.001 |
| VCT character time (s)                   | 127.8 ± 34.7   | 98.2 ± 17.0      | 0.004  |
| ADT <sup>5</sup> correct answer rate (%) | 95.7 ± 5.6     | 99.2 ± 1.0       | 0.018  |
| ADT hit rate (%)                         | 93.3 ± 5.5     | 99.2 ± 1.4       | <0.001 |

|                                          |                |                |        |
|------------------------------------------|----------------|----------------|--------|
| PASAT <sup>6</sup>                       | 27 [20.0–41.0] | 57.5 [54.5–59] | <0.001 |
| <b>TMT<sup>7</sup></b>                   |                |                |        |
| TMT-A (s)                                | 48.2 ± 17.9    | 36.5 ± 11.7    | 0.047  |
| TMT-B (s)                                | 130.7 ± 68.0   | 78.4 ± 25.1    | 0.005  |
| <b>VPTA<sup>8</sup></b>                  |                |                |        |
| Line bisection task score                | 1 [1.0–2.0]    | 0 [0–1]        | 0.018  |
| Line bisection task time (s)             | 4.7 ± 3.7      | 2.3 ± 1.6      | 0.024  |
| Albert’s test time (s)                   | 41.1 ± 23.8    | 20.7 ± 5.2     | 0.013  |
| Copying score                            | 0 [0.0–1.3]    | 0 [0–0]        | 0.025  |
| Copying time (s)                         | 111.5 ± 58.8   | 57.7 ± 28.4    | 0.003  |
| <b>S-PA<sup>9</sup></b>                  |                |                |        |
| No association raw score 1 <sup>st</sup> | 0 [0.0–2.0]    | 2 [1–5]        | 0.016  |
| No association raw score 2 <sup>nd</sup> | 2 [1.0–4.0]    | 5.5 [4.3–7.8]  | 0.004  |
| No association raw score 3 <sup>rd</sup> | 4 [2.0–6.0]    | 7.5 [4.5–9]    | 0.024  |

187 Data are given as average ± SD or as median [Q1–Q3]. Abbreviations: <sup>1</sup>FAB: Frontal Assessment

188 Battery, <sup>2</sup>MoCA-J: Japanese version of the Montreal cognitive assessment, <sup>3</sup>CAT: Clinical

189 Assessment for Attention, <sup>4</sup>VCT: visual cancellation task, <sup>5</sup>ADT: auditory detection task, <sup>6</sup>PASAT:

190 paced auditory serial addition task, <sup>7</sup>TMT: Trail Making Test, <sup>8</sup>VPTA: Visual Perception Test for

191 Agnosia, <sup>9</sup>S-PA: standard verbal paired-associate learning test

192

## 193 **Evoked fields**

### 194 **Latencies**

195 We evaluated the responses of each evoked field, distinguishing between the left and right,  
196 as well as the S and M, sides. The latencies of the components, and the differences of the latencies  
197 between components, of recorded evoked fields that were significantly different between patients with  
198 PD and HCs are shown in Table 2. We could not locate AEF P50m (Lc) in two patients and AEF  
199 P50m (Ri) in one patient because of an artifact; therefore, they were excluded from the analyses.

200

201

202 **Table 2. Results of the latencies of the components of evoked fields that were significantly**  
203 **different between patients with Parkinson’s disease and healthy control participants.**

|                             | <b>Patients</b>     | <b>Controls</b>     | <b>p</b> |
|-----------------------------|---------------------|---------------------|----------|
|                             | <b>Average ± SD</b> | <b>Average ± SD</b> |          |
| <b>VEF<sup>1</sup> N75m</b> |                     |                     |          |
| L                           | 86.7 ± 8.3          | 80.0 ± 3.6          | 0.005    |
| R                           | 88.2 ± 9.6          | 81.3 ± 2.6          | 0.007    |
| S <sup>4</sup>              | 86.7 ± 8.3          | 80.6 ± 2.4          | 0.006    |

|                             |              |              |       |
|-----------------------------|--------------|--------------|-------|
| M <sup>5</sup>              | 88.1 ± 9.6   | 80.6 ± 2.4   | 0.003 |
| <b>VEF P100m</b>            |              |              |       |
| L                           | 124.1 ± 17.7 | 111.9 ± 12.1 | 0.037 |
| <b>VEF N145m</b>            |              |              |       |
| L                           | 179.3 ± 20.2 | 165.3 ± 12.5 | 0.028 |
| <b>AEF<sup>2</sup> P50m</b> |              |              |       |
| Rc <sup>6</sup>             | 56.7 ± 6.3   | 52.3 ± 3.1   | 0.015 |
| Li <sup>7</sup>             | 67.2 ± 9.2   | 59.8 ± 5.3   | 0.009 |
| Si                          | 64.5 ± 9.3   | 57.9 ± 4.6   | 0.015 |
| Mi                          | 64.7 ± 11.9  | 57.9 ± 4.6   | 0.040 |
| <b>AEF P100m</b>            |              |              |       |
| Rc                          | 100.2 ± 12.5 | 90.9 ± 6.7   | 0.012 |
| Sc                          | 99.2 ± 13.8  | 91.0 ± 5.3   | 0.027 |
| Mc                          | 99.8 ± 13.8  | 91.0 ± 5.3   | 0.019 |
| Li                          | 113.3 ± 13.2 | 101.1 ± 6.2  | 0.002 |
| Ri                          | 108.0 ± 12.9 | 99.4 ± 6.2   | 0.020 |
| Si                          | 109.4 ± 13.6 | 100.2 ± 4.7  | 0.012 |
| Mi                          | 111.8 ± 12.9 | 100.2 ± 4.7  | 0.001 |

| <b>AEF P100m - P50m</b>     |             |             |        |
|-----------------------------|-------------|-------------|--------|
| Mc                          | 43.9 ± 8.9  | 38.0 ± 5.1  | 0.029  |
| <b>SEF<sup>3</sup> P60m</b> |             |             |        |
| L                           | 67.0 ± 12.7 | 53.4 ± 13.0 | 0.01   |
| R                           | 67.1 ± 12.0 | 48.1 ± 9.2  | <0.01  |
| S                           | 63.6 ± 12.3 | 50.8 ± 9.3  | <0.01  |
| M                           | 70.5 ± 11.3 | 50.8 ± 9.3  | <0.01  |
| <b>SEF P60m - N20m</b>      |             |             |        |
| L                           | 43.5 ± 11.6 | 30.7 ± 12.5 | 0.014  |
| R                           | 43.9 ± 11.8 | 25.7 ± 8.9  | <0.001 |
| S                           | 40.4 ± 11.9 | 28.2 ± 9.1  | 0.005  |
| M                           | 47.0 ± 10.5 | 26.9 ± 8.5  | <0.001 |
| <b>SEF P60m - P35m</b>      |             |             |        |
| L                           | 36.8 ± 12.4 | 23.5 ± 12.8 | 0.014  |
| R                           | 36.7 ± 11.9 | 18.7 ± 8.9  | <0.001 |
| S                           | 33.3 ± 11.8 | 21.1 ± 9.2  | 0.005  |
| M                           | 40.2 ± 11.4 | 19.9 ± 8.5  | <0.001 |



204 Latencies are reported in ms. Abbreviations: <sup>1</sup>VEF: visual evoked magnetic field, <sup>2</sup>AEF: auditory  
205 evoked magnetic field, <sup>3</sup>SEF: somatosensory evoked magnetic field, <sup>4</sup>S: severe side stimulation, <sup>5</sup>M:  
206 mild side stimulation, <sup>6</sup>c: contralateral side recording, <sup>7</sup>i: ipsilateral side recording.

207

208 The latencies of the VEF N75m (L, R, S, M), P100m (L), N145m (L), AEF P50m (Rc, Li, Si,  
209 Mi), and P100m (Rc, Sc, Mc, Li, Ri, Si, Mi) components, and of the SEF P60m (L, R, S, M)  
210 component, were significantly increased in patients with PD. Similarly, the latency differences of  
211 AEF P100m - P50m (Mc), SEF P60m - N20m (L, R, S, M), and P60m - P35m (L, R, S, M), were  
212 increased in patients with PD, and their standard deviations were also increased. No significant left-  
213 right difference in latency was seen in either patients with PD or in HCs. Moreover, there was no  
214 significant difference in the latency between the S and M sides in patients.

215

## 216 **Site locations**

217 To assess the sites where the magnetic fields were evoked, we compared the channel number  
218 of the sensor from which the maximum root mean square peak of each evoked field was derived,  
219 between the patients with PD and the HCs (S3 Table). There were no significant differences between  
220 patients with PD and HCs, except for three of the components: VEF N145m (R), AEF P50m (Lc), and  
221 SEF N20m (R).

222

223 **Correlation between evoked fields and clinical characteristics and**  
 224 **measures**

225 Table 3 shows where there were significant correlations between the scores of particular  
 226 clinical characteristics or measures, and the latencies, or latency differences, of components of evoked  
 227 fields, in patients with PD. The correlation coefficients are reported in S4 Table. With respect to  
 228 medications, we included L-DOPA, dopamine agonists, and the levodopa equivalent dose, except for  
 229 pramipexole and pergolide, which were taken by a small number of patients. The clinical scores and  
 230 evoked fields that were assessed here were significantly different between patients with PD and HCs  
 231 or were assessed only in PD patients.

232

233 **Table 3. Results of significant correlations between the latencies of components of evoked fields**  
 234 **and scores of clinical characteristics or measures in patients.**

235

|                        | VEF <sup>1</sup> | VEF   | VEF   | AEF <sup>2</sup> | AEF   | AEF             | SEF <sup>3</sup> | SEF            | SEF            |
|------------------------|------------------|-------|-------|------------------|-------|-----------------|------------------|----------------|----------------|
|                        | N75m             | P100m | N145m | P50m             | P100m | P100m -<br>P50m | P60m -<br>P60m   | P60m -<br>N20m | P60m -<br>P35m |
| <b>CAT<sup>4</sup></b> |                  |       |       |                  |       |                 |                  |                |                |
| ADT <sup>5</sup>       | hit rate         |       |       |                  |       |                 | L, M             | L, M           | L, M           |

|                                    |                        |   |  |    |                                                                    |    |      |      |      |   |
|------------------------------------|------------------------|---|--|----|--------------------------------------------------------------------|----|------|------|------|---|
|                                    | correct<br>answer rate |   |  |    |                                                                    |    |      |      |      | S |
| VCT <sup>6</sup> (character) time  |                        | L |  |    |                                                                    |    |      |      |      |   |
| <b>Medication</b>                  |                        |   |  |    |                                                                    |    |      |      |      |   |
| Levodopa/<br>benserazide           | M                      |   |  |    | Rc <sup>12</sup> ,<br>Mc,<br>Li <sup>13</sup> ,<br>Ri*, Si,<br>Mi* | Mc |      |      |      |   |
| Rotigotine                         |                        |   |  | Rc |                                                                    |    |      |      |      |   |
| Ropinirole                         | L                      |   |  |    |                                                                    |    |      |      |      |   |
| <b>UPDRS<sup>7</sup> Part 2 on</b> |                        |   |  |    |                                                                    |    |      |      |      |   |
| Total score                        |                        | L |  |    |                                                                    |    |      |      |      |   |
| Speech                             |                        |   |  |    |                                                                    |    | R, S | R, S | R, S |   |
| Swallowing                         |                        | L |  |    |                                                                    |    |      |      |      |   |
| <b>UPDRS Part 3 on</b>             |                        |   |  |    |                                                                    |    |      |      |      |   |
| Speech                             |                        |   |  |    | Ri*                                                                |    |      |      |      |   |
| Gait                               |                        | L |  |    |                                                                    |    |      |      |      |   |

| UPDRS Part 3 off             |                        |      |   |   |        |                   |  |      |   |
|------------------------------|------------------------|------|---|---|--------|-------------------|--|------|---|
| Total                        |                        |      |   |   |        | Mi                |  |      |   |
| Speech                       |                        | L, M |   |   |        |                   |  |      |   |
| Facial expression            |                        |      |   |   | Li, Mi | Rc, Sc,<br>Mc, Li |  | R, S | S |
| Rigidity                     | RLE <sup>8</sup>       |      |   |   |        |                   |  | R    |   |
|                              | LLE                    | R    |   |   |        |                   |  | R    |   |
|                              | S <sup>9</sup> LE      |      |   |   |        | Mi                |  | S    | S |
|                              | M <sup>10</sup> L<br>E |      |   |   |        | Mi                |  |      |   |
| Tremor at rest               | LUE<br><sup>11</sup>   | L    |   |   |        |                   |  |      |   |
|                              | RUE                    | L    |   |   |        |                   |  |      |   |
|                              | SLE                    | M    |   |   |        |                   |  |      |   |
| Action or<br>postural tremor | L                      |      | L | L |        |                   |  |      |   |
|                              | R                      |      | L | L |        |                   |  |      |   |
| Finger taps                  | R                      |      | L | L |        |                   |  |      |   |
|                              | S                      | M    |   |   |        |                   |  |      |   |

|                              |   |   |   |   |        |                   |      |      |   |   |
|------------------------------|---|---|---|---|--------|-------------------|------|------|---|---|
|                              | M | M |   |   |        |                   |      |      |   |   |
| Hand movements               | S | M |   |   |        |                   |      |      |   |   |
|                              | M | M |   |   |        |                   |      |      |   |   |
| Rapid alternating movements  | L |   |   |   |        | Li                |      |      |   |   |
|                              | S |   |   |   |        | Si                |      |      |   |   |
|                              | M |   |   |   | Mi     | Sc                |      |      |   |   |
| Leg agility                  | L | R |   |   |        |                   |      |      |   |   |
|                              | R | R |   |   |        |                   |      |      |   |   |
|                              | S |   |   |   |        | Mi                |      |      |   |   |
|                              | M |   |   |   |        | Mi                |      |      |   |   |
| Arising from chair           |   |   |   |   | Li     |                   | R, S | S    |   |   |
| Posture                      |   |   | L | L |        | Li                |      | R, S | S | S |
| Gait                         |   |   |   |   | Li, Mi | Mc, Li,<br>Si     |      | R, S | S | S |
| Postural stability           |   |   |   |   |        | Rc, Sc,<br>Li, Mi |      | R, S | S |   |
| Body bradykinesia            |   | R |   |   |        | Li, Mi            |      | R, S | S | S |
| <b>UPDRS off Total score</b> |   |   |   |   |        |                   |      |      |   |   |

|  |  |  |  |        |        |  |      |   |   |
|--|--|--|--|--------|--------|--|------|---|---|
|  |  |  |  | Li, Mi | Li, Mi |  | R, S | S | S |
|--|--|--|--|--------|--------|--|------|---|---|

236 Orange cell: positive correlation, Blue cell: negative correlation, \*: Significant after Bonferroni  
237 correction. Abbreviations: <sup>1</sup>VEF: visual evoked magnetic field, <sup>2</sup>AEF: auditory evoked magnetic field,  
238 <sup>3</sup>SEF: somatosensory evoked magnetic field, <sup>4</sup>CAT: Clinical Assessment for Attention <sup>5</sup>ADT: auditory  
239 detection task, <sup>6</sup>VCT: visual cancellation task, <sup>7</sup>UPDRS: Unified Parkinson's Disease Rating Scale,  
240 <sup>8</sup>LE: lower extremity, <sup>9</sup>S: severe side, <sup>10</sup>M: mild side, <sup>11</sup>UE: upper extremity, <sup>12</sup>c: contralateral side  
241 recording, <sup>13</sup>i: ipsilateral side recording.

242

243 Multiple medications and motor symptoms correlated with latencies or latency differences,  
244 but the CAT was the only cognitive test for which the scores correlated with the evoked field data.  
245 After performing a Bonferroni correction, only three pairs of latencies, or latency differences, showed  
246 statistically significant correlations with clinical scores or medication: levodopa/benserazide and AEF  
247 P100m (Ri, Mi) as well as UPDRS Part 3 Speech in the on-state and AEF P100m (Ri). A similar  
248 analysis was performed for the HCs, but no correlations were shared between HCs and patients with  
249 PD.

250

## 251 Discussion

### 252 Cognitive functioning

253           There were significant differences in MoCA-J (total score, Language [fluency], abstraction,  
254   delayed recall), S-PA (no association raw score 1<sup>st</sup>, 2<sup>nd</sup>, 3<sup>rd</sup>), FAB (Lexical fluency, Motor series,  
255   Go/No-Go), TMT-A, B, CAT (tapping span [order], VCT [simple symbol time, simple symbol hit rate,  
256   complex symbol time, complex symbol hit rate, number time, character time], ADT [correct answer  
257   rate, hit rate], PASAT), and VPTA (line bisection task [score, time], Albert's test time, copying [score,  
258   time]) scores between patients with PD and HCs, all of which reflected a decrease in cognitive  
259   functioning in PD patients.

260           FAB is a test that assesses frontal lobe functions involving executive dysfunction and  
261   working memory, through tasks such as lexical fluency, motor series, and Go/No-Go. A previous  
262   study showed that the FAB total score was low in patients with PD [26]. In addition, a study that used  
263   the Wisconsin card sorting test showed frontal lobe dysfunction, especially executive dysfunction, in  
264   patients with PD [27]. Both studies are consistent with the findings of this study. Ohta and Suzuki  
265   [28] have reported that PD patients with mild cognitive impairment had lower scores in MoCA-J than  
266   in MMSE, especially on Short-Term Memory, Language (fluency), and Delayed recall. This is almost  
267   the same as our study because our patients had similar MMSE scores but lower scores in MoCA-J  
268   (Language (fluency), and Delayed recall) than HCs. The TMT-A, B, and CAT items, including  
269   tapping span, VCT, ADT, and PASAT, are all affected by deficits in sustained attention. Maruyama  
270   [29] reported sustained attention deficits in PD, and the results of this study are also thought to result  
271   from sustained attention deficits.

272 A previous report suggested that visual perception was impaired in patients with PD [26].

273 While the tasks in that study were different from those in this study, significantly higher VPTA scores

274 in patients with PD in this study may also be due to visual impairment. It may also be that the scores

275 of items with actions such as TMT, CAT (tapping span, VCT, ADT, PASAT), and VPTA (line

276 bisection task, Albert's test, copying) were significantly increased in PD patients due to bradykinesia.

277 There is no previous report on S-PA in patients with PD. S-PA is a test on verbal paired-associate

278 learning, which is evaluated qualitatively based on raw scores and obtaining rating scores. Although

279 the rating score was not significantly different between patients with PD and HCs, PD patients may

280 have verbal memory impairment because the raw scores in all three trials were significantly low.

281 Taken together, these results suggest that PD patients have at least mild cognitive impairment from

282 PD.

283

## 284 **Evoked fields**

285 The latencies of VEF, AEF, and SEF were increased in PD patients and they also had large

286 SDs. This indicates that evoked field latencies in PD patients were quite variable, possibly providing

287 indirect evidence that the pathophysiology of PD affects evoked field latencies. To the best of our

288 knowledge, no study has been conducted on the association between evoked responses and cognitive

289 functioning, except for a study assessing MMSE [10-13]. Thus, this study provides new insights into

290 the association between evoked responses and cognitive functioning in patients with PD.



291           With respect to the clinical measures, CAT was the only cognitive test that was significantly  
292 associated with evoked fields; however, numerous elements of the UPDRS and patients' medications  
293 were associated with evoked fields. This suggests that medication and motor symptoms, rather than  
294 cognitive function, influence the latencies of evoked fields. When a Bonferroni correction was  
295 performed, only three pairs of associations remained significant: levodopa/benserazide and AEF  
296 P100m (Ri, Mi) as well as UPDRS Part 3 Speech in the on-state and AEF P100m (Ri). These results  
297 indicate that the evoked fields are influenced mainly by medication and motor symptoms. Because  
298 basal ganglia play a major role in motor symptoms of PD and their function is regulated by dopamine,  
299 it may be that evoked fields reflect basal ganglia function.

300           On the other hand, there were no significant correlations that survived Bonferroni correction  
301 between UPDRS Part 3 in the off-state and latencies of the evoked fields, even though there were  
302 several significant correlations before the correction. There may be various reasons for this finding.  
303 First, since MEG was conducted during the on-state, evoked fields may simply reflect the motor  
304 symptoms in the on-state. Second, this result may indicate that motor symptoms do not affect evoked  
305 fields. Third, this result may be erroneous because UPDRS Part 3 in the off-state was assessed in only  
306 a small number of the patients. Nevertheless, elements of the UPDRS Part 3 in the off-state are factors  
307 that could plausibly influence the evoked brain magnetic field; thus, these findings should be assessed  
308 in a larger number of subjects in future studies.

309

## 310 **VEF**

311           When discussing the results of this study, we also refer to reports on VEP because the N75m,  
312 P100m, and N145m VEF components correspond to the N75, P100, and N145 VEP components,  
313 respectively [30]. Several studies have reported that the latency of the VEP P100 component is  
314 increased in patients with PD [13,31], while one study reported that the latencies of the VEF N75m  
315 and P100m components were increased in patients with PD [8]. Fujisawa et al. [8] also reported that  
316 the P100m – N75m latency difference was increased in patients with PD, but this latency difference  
317 was not increased in the present study. No previous study has reported increased latencies of VEP  
318 N145 or VEF N145m components in patients with PD.

319           The N75m and P100m components are thought to originate from the visual cortex, and the  
320 N145m component is thought to originate from the extrastriate cortex [32]. In this study, the latencies  
321 of the N75m (L, R, S, M), P100m (L), and N145m (L) components were increased in PD, but central  
322 conduction times (P100m - N75m, N145m - P100m, and N145m - N75m latency differences) did not  
323 differ between patients with PD and HCs. These results support a previous study that reported that the  
324 origin of the conduction delay may be peripheral rather than cortical [8]. Processing delays in the  
325 retina or along the pathway to the cortex may contribute more than that of the cortex to the delay in  
326 the VEF. It should be noted that where there were significant differences between PD patients and  
327 HCs in the latencies of particular components (i.e. N75m [L, R, S, M], P100m [L], and N145m [L]),

328 these differences were not due to variations in location, as there were no significant differences  
329 between patients with PD and HCs in the site locations of these components.

330 For cognitive tests, CAT VCT (characters) time was positively associated with the latency  
331 of the P100m (L) component. VCT reflects visual selective attention; VCT time is prolonged in  
332 individuals with a visual selective attention deficit. Thus, based on our results, the P100m (L) latency  
333 may reflect visual selective attention. VCT time is also affected by bradykinesia of Parkinsonism  
334 because it partly depends on writing speed, but there was no association between the latency of the  
335 P100m (L) component and the UPDRS Part 3 body bradykinesia score. This helps support our  
336 hypothesis that the P100m (L) may reflect visual selective attention. Okuda et al. [11] reported that  
337 the P100 latencies were negatively correlated with the MMSE score in patients with PD, but no such  
338 association was found in this study.

339 In terms of motor symptoms, both the total score and the swallowing score of UPDRS Part 2  
340 in the on-state, and the Walk score of UPDRS Part 3 in the on-state, were positively associated with  
341 latency of the P100m (L) component. These results were consistent with those of previous studies that  
342 found that the latency of the P100 VEP component in patients with PD was positively correlated with  
343 the Hoehn–Yahr stage as well as disease severity [2,6,33]. It remains unclear why the latency of the  
344 N145m component, which is evoked after the P100m, had no significant association with any motor  
345 symptom associated with the latency of P100m, but it may be because the SDs of the latencies of the  
346 N145m component were greater than those of the P100m, in both PD patients and controls.

347 For the UPDRS Part 3 in the off-state, action or postural tremor (L, R) as well as posture  
348 scores, were positively associated with the latency of the P100m (L) and the N145m (L) components,  
349 while tremor at rest (R upper extremity [UE], LUE) were positively associated with the latency of the  
350 N75m (L) component. However, there were negative associations between the finger taps (R) score  
351 and the latency of the P100m (L) and N145m (L) components; speech score and the latency of the  
352 N75m (L) component; speech, tremor at rest (S lower extremity [LE]), finger taps (S, M), and hand  
353 movement (S, M) scores, and the latency of the N75m (M) component; rigidity (LLE), leg agility (L,  
354 R), and body bradykinesia scores, and the latency of the N75m (R) component. The latencies of the  
355 P100m (L) and N145m (L) components were negatively correlated with finger taps (L), while they  
356 were positively correlated with other motor symptoms, posing a contradiction. This may have been  
357 due to the small number of patients that were assessed for the UPDRS Part 3 in the off-state.

358 In terms of medication, levodopa/benserazide was positively associated with the latency of  
359 the N75m (M) component, and ropinirole was positively associated with the latency of the N75m (L)  
360 component, which seems to reflect the need for more medication as motor symptoms progress. There  
361 have been no previous reports of the association between daily dosage of anti-parkinsonian drugs and  
362 VEF. However, it has been reported that the increased latency of the P100 VEP component in patients  
363 with PD is improved by L-DOPA treatment [3,6]. It may be that increased VEF latencies, latency  
364 differences, and correlations between latencies and clinical characteristics and measures, would be  
365 more pronounced and detectable if the evoked fields were obtained without medication. Nevertheless,

366 it should be noted that when a Bonferroni correction was performed, no association between latencies  
367 of the VEF and scores on the clinical measures remained statistically significant.

368

## 369 **AEF**

370 To the best of our knowledge, there have been no reports on increases in the latencies of the  
371 AEF P50m and P100m components. As it has been reported that interhemispheric latency differences  
372 in AEF P50m and P100m were significantly increased in PD patients in the left-ear condition [34], we  
373 calculated the interhemispheric latency differences in the left-ear condition in this study: P50m (Li) -  
374 P50m (Lc) [PD  $10.3 \pm 7.2$  vs. HCs  $8.5 \pm 7.8$ ,  $p = 0.25$ ] and P100m (Li) - P100m (Lc) [ $14.5 \pm 9.0$  vs.  
375  $12.6 \pm 7.3$ ,  $p = 0.33$ ]. No significant differences were found.

376 The AEF P50m component is thought to be equivalent to the Pb component of the middle  
377 latency response (MLR) [35]; the AEF P100m component is thought to be equivalent to the N1  
378 component of the auditory late response (ALR) [36], and both of these components (the Pb and the  
379 N1) originate from the cerebral cortex. It has previously been reported that the amplitude of the  
380 middle latency response of the Pb component is increased in PD patients [37], but there have been no  
381 reports of increased latencies of the middle latency response of the Pb component or of the auditory  
382 late response of the N1 component in PD patients.

383 In this study, the latencies of the AEF P50m (Rc, Li, Si, Mi) and P100m (Rc, Sc, Mc, Li, Ri,  
384 Si, Mi) components were increased. Since the latency of wave V of the auditory brainstem response

385 has been reported to be increased in PD patients [4], latencies of the AEF P50m and P100m  
386 components in PD patients may be more increased in the periphery than in the thalamus. On the other  
387 hand, the latency of the AEF P100m - P50m (Mc) difference increased, and the delay was more  
388 apparent in the P100m than in the P50m component; therefore, the latencies may also be increased at  
389 the cortex. Note that because the sites where AEF P50m (Rc, Li, Si, Mi) and P100m (Rc, Sc, Mc, Li,  
390 Ri, Si, Mi) components were evoked did not differ between patients with PD and HCs, the observed  
391 differences were not related to locational differences.

392           While there was no association between cognitive tests and AEF, in terms of motor  
393 symptoms, the speech score of the UPDRS Part 3 in the on-state was positively associated with the  
394 latency of the P100m (Ri) component. This association remained significant when a Bonferroni  
395 correction was performed. Since the language area is generally located in the left temporal lobe, the  
396 association between the AEF recorded from the right temporal lobe and language function is  
397 unknown; it may not be related to language function, but rather to other factors that affect articulation  
398 (such as voice volume).

399           For other motor symptoms, there were numerous associations between elements of the  
400 UPDRS Part 3 in the off-state and the AEF latencies, but none of these were statistically significant  
401 after Bonferroni correction. For instance, the rapid alternating movements (M) score was positively  
402 associated with the latency of the P50m (Mi) component, and the rapid alternating movements (L, S)  
403 score was positively associated with the latency of the P100m (Li, Si) component; these correlations

404 coincided with the laterality of the examined side and the recording side of the evoked field. These  
405 results suggest that AEF may be associated with motor symptoms in the ipsilateral hand. Since rising  
406 from a chair, posture, gait, and postural stability scores were all positively associated with the latency  
407 of the P100m (Li) component, an increased latency in the P100m (Li) component may reflect a  
408 postural reflex disorder. Rigidity (SLE, MLE), leg agility (S, M), and body bradykinesia scores,  
409 which are all related to rigidity of the legs, were all positively associated with the latency of the  
410 P100m (Mi) component. Thus, an increased latency of the P100m (Mi) component may reflect leg  
411 rigidity.

412           The total score of the UPDRS in the off-state, which included Part 1, Part 2 in the off-state,  
413 Part 3 in the off-state, and Part 4, was positively associated with the latencies of the P50m (Li, Mi)  
414 and P100m (Li, Mi) components. This may be partly due to the score for Part 3 in the off-state driving  
415 the effect. However, the number of elements of Part 3 in the off-state that correlated with the latencies  
416 of the P50m (Li, Mi) and P100m (Li, Mi) components was too small for the number of elements of  
417 the total score of the UPDRS in the off-state. It is possible that Part 1, Part 2 in the off-state, and Part  
418 4 themselves were potentially correlated with the latencies of the P50m (Li, Mi) and P100m (Li, Mi)  
419 components.

420           A previous study reported that the latency of wave V of the auditory brainstem response was  
421 increased in PD patients, but was not associated with motor symptoms or disease severity [4], and  
422 there have been no previous studies reporting associations of the AEF, MLR, or ALR with motor

423 symptoms or disease severity. Since this is the first study of an association between AEF and motor  
424 symptoms, which are causally related, further accumulation of data is required in the future.

425           A positive association was found between the daily dosage of levodopa/benserazide and the  
426 latency of the P100m (Rc, Mc, Li, Ri, Si, Mi) component and the latency difference of P100m - P50m  
427 (Mc). The association with the latency of the P100m (Ri, Mi) component remained significant after  
428 Bonferroni correction. Additionally, an association was found between rotigotine and the latency of  
429 the P50m (Rc) component. Since the latency of the P100m (Ri) component had a strong positive  
430 association with the speech score of the UPDRS Part 3 in the on-state, and the latencies of the P100m  
431 (Li, Mi) component were also positively associated with the UPDRS Part 3 score in the off-state,  
432 these associations with medication may reflect PD severity.

433           It has been reported that dopamine administration affects the auditory responses in the  
434 inferior colliculus in mice [38]. In addition, there have been reports of rats having increased  
435 auditory-evoked responses from the brainstem to the basal ganglia after dopamine loading [39].  
436 Dopamine neurons are associated with the auditory tract, and auditory evoked responses may reflect  
437 the state of dopamine neurons as affected by medication or pathophysiology.

438

## 439 **SEF**

440           Since the SEF N20m component originates from area 3b of the primary sensory cortex,  
441 which is also the origin of the SEP N20 component [40-41], these two are considered equivalent.



442 However, since the P35m and P60m SEF components also originate from area 3b of the primary  
443 sensory cortex [40] and the N30 SEP component originates from the supplementary motor area [42],  
444 they are considered to be different.

445 Most previous studies on somatosensory evoked responses found that the amplitude of the  
446 N30 SEP component decreased in PD subjects. Most of the few existing reports stated that N20 SEP  
447 component does not differ in patients with PD, but one report stated that the amplitude of the N20m  
448 SEF component on the symptomatically more severe side in PD patients is greater than that on the  
449 contralateral side [43]. In this study, we did not evaluate the amplitude of the N20m component.

450 In this study, the latency of the P35m component was not significantly different between  
451 patients with PD and HCs, but the latency of the P60m component was significantly higher in PD  
452 patients. Furthermore, for central conduction time, both P60m - P35m and P60m - N20m latency  
453 differences were significantly increased in the patients with PD, regardless of the stimulating side.  
454 This implies that only the latency of the P60m component increased. To the best of our knowledge, an  
455 increase in latency of the P60m component in PD has not been reported previously. Since the sites  
456 where the P60m (L, R, S, M) component were evoked were not different between patients with PD  
457 and HCs, the delay in the latency of the P60m component in PD patients was not due to location  
458 differences. In addition, the N20m, P35m, and P60m components originate from the same area of the  
459 primary sensory cortex (area 3b), and the latencies of the N20m and P35m components did not differ  
460 between patients with PD and HCs. As neurodegeneration of the primary sensory cortex rarely occurs

461 in PD patients, it is thought that the delay of the P60m component does not occur in the sensory  
462 cortex, but rather in the pathway after P35m.

463 For cognitive tests, the CAT ADT hit rate was negatively associated with the latency of the  
464 P60m (L, M) component and the latency differences of P60m – N20m (L, M) and P60m – P35m (L,  
465 M). The CAT ADT correct-answer rate was also negatively associated with the P60m - P35m (S)  
466 latency difference. ADT assesses selective auditory attention, and hit rates and correct-answer rates  
467 decrease as selective auditory attention is disturbed. Hence, the latency of the P60m component may  
468 be associated with selective auditory attention, even though no association was found between ADT  
469 and somatosensory processing or parietal lobe activity.

470 For motor symptoms, numerous associations were found between UPDRS scores and SEF  
471 latencies. As indicated above, when the latency difference from the P60m component is considered to  
472 be equal to the latency of the P60m component, the results can be restated as follows: the scores for  
473 speech in UPDRS Part 2 in the on-state; facial expression, rising from chair, posture, gait, postural  
474 stability, and body bradykinesia in UPDRS Part 3 in the off-state; and the UPDRS total score in the  
475 off-state, were all positively associated with the latency of the P60m (R, S) component. Scores for  
476 rigidity (RLE, LLE) in UPDRS Part 3 in the off-state was positively associated with the latency of the  
477 P60m (R) component, and scores for rigidity (SLE) in UPDRS Part 3 in the off-state was positively  
478 associated with the latency of the P60m (S) component. The latency of the P60m (R) and/or P60m (S)  
479 component had numerous positive associations with UPDRS scores; hence, the latency of the P60m

480 (R, S) component may reflect motor symptoms of PD. Previous studies have reported that the  
481 amplitude of the N30 SEP component is decreased in patients with PD and is negatively associated  
482 with motor symptoms [3,44-46]. It has also been suggested that SEPs from the frontal scalp sites  
483 could be considered markers of the functionality of a cortico-subcortico-cortical loop [47]. However,  
484 we could not find any report on P60m SEF latency. Considering that in this study, only the latency of  
485 the P60m component differed between patients with PD and HCs, and was associated with motor  
486 symptoms, the latency of the P60m component may reflect basal ganglia function. Nevertheless, it  
487 should be noted that when a Bonferroni correction was performed, no association between SEF and  
488 UPDRS scores remained significant. For medication, we found no significant association with SEF  
489 latencies.

490

## 491 **Association between evoked fields from different sensory stimuli**

492 For the evoked fields that showed a significant difference between PD patients and HCs, we  
493 compared two pairs of evoked fields of different sensory stimulations in PD patients. For the SEF,  
494 latency differences (P60m – N20m, P60m – P35m) were considered equivalent to the P60m of  
495 ipsilateral stimulation and were excluded from analysis. Four pairs demonstrated significant  
496 associations: latencies of the SEF P60m (S) component and the AEF P100m (Mc) component ( $R =$   
497  $0.66$ ,  $p = 0.001$ ), latency of the SEF P60m (S) component and the latency difference of the AEF  
498 P100m - P50m (Mc) ( $R = 0.62$ ,  $p < 0.003$ ), latencies of the SEF P60m (R) component and the AEF

499 P100m (Mc) component ( $R = 0.69$ ,  $p < 0.001$ ), and the latency of the SEF P60m (R) component and  
500 the latency difference of AEF P100m – P50m (Mc) ( $R = 0.71$ ,  $p < 0.001$ ). In addition, the latencies of  
501 the SEF P60m (R, S) and AEF P100m (Mc) components both showed positive associations with the  
502 scores for facial expression and gait in UPDRS Part 3 in the off-state. Based on these results, the  
503 delays may reflect basal ganglia function and may occur in parallel with the progression of motor  
504 symptoms. However, the latencies of the SEF P60m (R, S) component and the latency difference of  
505 AEF P100m – P50m (Mc) had no common associations. Furthermore, these four associations became  
506 nonsignificant after Bonferroni correction ( $p = 0.212$ ,  $0.478$ ,  $0.101$ , and  $0.067$ , respectively).

507

## 508 **Limitations**

509         There were some limitations to this study. First, MEG was performed on patients in the  
510 on-state, and thus, the results may have been affected by medication. In addition, for UPDRS Part 3,  
511 we may have identified false-positive associations because only eight patients were evaluated in the  
512 off-state. In the future, it will be necessary to assess UPDRS, cognitive functions, and MEG  
513 recordings in the off-state for all participants.

514         Second, there were few associations between the cognitive assessments and evoked fields,  
515 considering the number of cognitive tests that were administered. This may be because the VEF, AEF,  
516 and SEF are reflective of processing in the primary sensory cortex, while cognitive tasks are  
517 processed at higher levels of the sensory cortex. The association between event-related potentials,

518 which are thought to reflect higher cognitive function, and cognitive functioning should be assessed.  
519 In addition, the cognitive impairment of the patients in this study was mild. Since abnormal evoked  
520 potentials are more likely to be observed in patients with dementia [11-13,33,48,49], this population  
521 bias may underlie the few significant associations found. Alternatively, more participants needed to be  
522 included because our patient population was heterogeneous, and we examined numerous parameters.  
523 Lastly, when assessing the site of sensors, the actual inter-sensor distance of MEG was not  
524 necessarily ordered by the channel number; in the future, the actual two-dimensional distribution  
525 rather than the rank scale should be used.

526

## 527 **Conclusions**

528 We investigated the characteristics of evoked fields in patients with PD. The latencies of the  
529 VEF N75m, P100m, N145m, AEF P50m, P100m, and SEF P60m components were greater in PD  
530 patients than in HCs. The increased latencies of VEF, AEF, and SEF were correlated mainly with  
531 medication and motor symptoms, and less with cognitive tasks. These findings suggest that evoked  
532 fields reflect basal ganglia function and are candidates for assessing motor symptoms or drug  
533 treatment effects in PD patients.

534

## 535 **Acknowledgement**

536 We thank Naoki Nishimoto, Ph.D., for advice regarding statistical analysis, Noriki Ochi for  
537 conducting MEG evaluations, Atsushi Shimojo for advice of MEG analysis, and Editage  
538 ([www.editage.com](http://www.editage.com)) for English language editing.

539

## 540 **References**

- 541 1. Diederich NJ, Fénelon G, Stebbins G, Goetz CG. Hallucinations in Parkinson disease. *Nat Rev*  
542 *Neurol* 2009;5:331-342. <https://doi.org/10.1038/nrneurol.2009.62>.
- 543 2. Bodis-Wollner I, Yahr MD. Measurements of visual evoked potentials in Parkinson's disease.  
544 *Brain*. 1978;101: 661-671. <https://doi.org/10.1093/brain/101.4.661>.
- 545 3. Rossini PM, Traversa R, Boccasena P, Martino G, Passarelli F, Pacifici L, et al. Parkinson's  
546 disease and somatosensory evoked potentials: apomorphine-induced transient potentiation of  
547 frontal components. *Neurology*. 1993;43: 2495-2500. <https://doi.org/10.1212/wnl.43.12.2495>.
- 548 4. Tachibana H, Takeda M, Tanaka T, Nishimura H, Sugita M. Brainstem auditory evoked  
549 potentials in parkinsonism. *Jpn J Clin Physiol*. 1988;18: 429-4436 (in Japanese).
- 550 5. Drory VE, Inzelberg R, Groozman GB, Korczyn AD. N30 somatosensory evoked potentials in  
551 patients with unilateral Parkinson's disease. *Acta Neurol Scand*. 1998;97: 73-76.  
552 <https://doi.org/10.1111/j.1600-0404.1998.tb00613.x>.

- 553 6. Onofrij M, Ghilardi MF, Basciani M, Gambi D. Visual evoked potentials in parkinsonism and  
554 dopamine blockade reveal a stimulus-dependent dopamine function in humans. *J Neurol*  
555 *Neurosurg Psychiatr.* 1986;49: 1150-1159. <https://doi.org/10.1136/jnnp.49.10.1150>.
- 556 7. Fahn, S., Elton, R.L., UPDRS program members. Unified Parkinson's Disease Rating Scale. In:  
557 Fahn S, Marsden CD, Goldstein M, Calne DB. editors. *Recent developments in Parkinson's*  
558 *disease*, vol 2. Florham Park, NJ: Macmillan Health Care Information; 1987; p153-163.
- 559 8. Fujisawa Y, Minato T, Uemura JI, Hoshiyama M, Watanabe H, Hirayama M. Association  
560 between changes in visual evoked magnetic fields and non-motor features in Parkinson's disease.  
561 *Nagoya J Med Sci.* 2017;79: 147-155. <https://doi.org/10.18999/nagjms.79.2.147>.
- 562 9. Kang SY, Ma HI. N30 somatosensory evoked potential is negatively correlated with motor  
563 function in Parkinson's disease. *J Mov Disord.* 2016;9: 35-39.  
564 <https://doi.org/10.14802/jmd.15038>.
- 565 10. Folstein MF, Folstein SE, McHugh PR. "Mini-mental state". A practical method for grading the  
566 cognitive state of patients for the clinician. *J Psychiatr Res.* 1975;12: 189-198.  
567 [https://doi.org/10.1016/0022-3956\(75\)90026-6](https://doi.org/10.1016/0022-3956(75)90026-6).
- 568 11. Okuda B, Tachibana H, Kawabata K, Takeda M, Sugita M. Visual evoked potentials (VEPs) in  
569 Parkinson's disease: correlation of pattern VEPs abnormality with dementia. *Alzheimer Dis*  
570 *Assoc Disord.* 1995;9: 68-72. <https://doi.org/10.1097/00002093-199509020-00002>.

- 571 12. Tachibana H. Visual evoked potentials in Parkinson's disease and dementing illness. Clin  
572 Electroencephalogr. 1998;40: 25-31 (in Japanese).
- 573 13. Takeda M, Tachibana H, Okuda B, Kawabata K, Sugita M. Event-related potential and visual  
574 evoked potential in patients with Parkinson's disease. Nihon Ronen Igakkai Zasshi. 1993;30:  
575 363-368. <https://doi.org/10.3143/geriatrics.30.363> (in Japanese).
- 576 14. Postuma RB, Berg D, Stern M, Poewe W, Olanow CW, Oertel W, et al. MDS clinical diagnostic  
577 criteria for Parkinson's disease. Mov Disord. 2015;30: 1591-1601.  
578 <https://doi.org/10.1002/mds.26424>.
- 579 15. Goetz CG, Poewe W, Rascol O, Sampaio C, Stebbins GT, Counsell C, et al. Movement Disorder  
580 Society Task Force report on the Hoehn and Yahr staging scale: Status and recommendations.  
581 Mov Disord. 2004;19: 1020-1028. <https://doi.org/10.1002/mds.20213>.
- 582 16. Dubois B, Slachevsky A, Litvan I, Pillon B. The FAB: A Frontal Assessment Battery at bedside.  
583 Neurology. 2000;55: 1621-1626. <https://doi.org/10.1212/wnl.55.11.1621>.
- 584 17. Uchiyama M, Nishio Y, Yokoi K, Hirayama K, Imamura T, Shimomura T, et al. Pareidolias:  
585 complex visual illusions in dementia with Lewy bodies. Brain. 2012;135: 2458-2469.  
586 <https://doi.org/10.1093/brain/aws126>.
- 587 18. Suzuki H, Fujiwara Y. *Montreal Cognitive Assessment (MoCA) no nihongoban sakusei to sono*  
588 *yuukousei ni tsuite.* (Creation and the effectiveness of Japanese version of the Montreal Cognitive  
589 Assessment (MoCA).) Jpn J Geriat Psychiatry. 2010;21: 198-202 (in Japanese).



- 590 19. Japan Society for Higher Brain Dysfunction. Clinical Assessment for Attention (CAT), Clinical  
591 Assessment for Spontaneity (CAS), Tokyo, Shinkoh Igaku Shuppansha, 2006 (in Japanese).
- 592 20. Partington JE, Leiter RG. Partington's Pathway Test. The Psychological Service Center Bulletin  
593 1949;1: 9-20.
- 594 21. Fujita K, Maekawa H, Dairoku K, Yamanaka K. A Japanese version of the WAIS-III, Tokyo,  
595 Nihon Bunka Kagakusha. 2006 (in Japanese).
- 596 22. Japan Society for Higher Brain Dysfunction. Visual Perception Test for Agnosia, Tokyo,  
597 Shinkoh Igaku Shuppansha. 2003 (in Japanese).
- 598 23. Raven JC. Guide to Using the Coloured Progressive Matrices, London: H.K. Lewis & Co.; 1965.
- 599 24. Japan Society for Higher Brain Dysfunction. Standard verbal paired-associate learning test,  
600 Tokyo, Shinkoh Igaku Shuppansha. 2014 (in Japanese).
- 601 25. Tomlinson CL, Stowe R, Patel S, Rick C, Gray R, Clarke CE. Systematic review of levodopa  
602 dose equivalency reporting in Parkinson's disease. *Mov Disord.* 2010;25: 1649-1653.  
603 <https://doi.org/10.1002/mds.23429>.
- 604 26. Kurisaki H. Cognitive impairment of Parkinson's disease. *J Cogn Neurosci.* 2009;11: 220-227 (in  
605 Japanese). <https://doi.org/10.11253/ninchishinkeikagaku.11.220>
- 606 27. Taylor, AE, Saint-Cyr, JA, Lang, AE. Frontal lobe dysfunction in Parkinson's disease. The  
607 cortical focus of neostriatal outflow. *Brain.* 1986;109: 845-883.  
608 <https://doi.org/10.1093/brain/109.5.845>

- 609 28. Ohta K, Suzuki N. Cognitive impairment in Parkinson's disease patients evaluated by the  
610 Montreal Cognitive Assessment and the Mini-Mental State Examination. A multicenter study of  
611 Keio PD database. *Ronenki Ninchisho Kenkyukaishi*. 2013;20: 1-5 (in Japanese).
- 612 29. Maruyama T. Cognitive dysfunction in Parkinson's disease. *Nihon Rinsho*. 2000;58: 2007-2015  
613 (in Japanese).
- 614 30. Shigeto H, Tobimatsu S, Yamamoto T, Kobayashi T, Kato M. Visual evoked cortical magnetic  
615 responses to checkerboard pattern reversal stimulation: a study on the neural generators of N75,  
616 P100 and N145. *J Neurol Sci*. 1998;156: 186-194.  
617 [https://doi.org/10.1016/s0022-510x\(98\)00026-4](https://doi.org/10.1016/s0022-510x(98)00026-4).
- 618 31. Matsui H, Udaka F, Tamura A, Oda M, Kubori T, Nishinaka K, et al. The relation between visual  
619 hallucinations and visual evoked potential in Parkinson disease. *Clin Neuropharmacol* 2005;28:  
620 79-82. <https://doi.org/10.1097/01.wnf.0000157066.50948.65>.
- 621 32. Nakamura A, Kakigi R, Hoshiyama M, Koyama S, Kitamura Y, Shimojo M. Visual evoked  
622 cortical magnetic fields to pattern reversal stimulation. *Brain Res Cogn Brain Res*. 1997;6: 9-22.  
623 [https://doi.org/10.1016/S0926-6410\(97\)00013-X](https://doi.org/10.1016/S0926-6410(97)00013-X).
- 624 33. Calzetti S, Franchi A, Taratufolo G, Groppi E. Simultaneous VEP and PERG investigations in  
625 early Parkinson's disease. *J Neurol Neurosurg Psychiatry*. 1990;53: 114-117.  
626 <https://doi.org/10.1136/jnnp.53.2.114>.

- 627 34. Pekkonen E, Ahveninen J, Virtanen J, Teräväinen H. Parkinson's disease selectively impairs  
628 preattentive auditory processing: An MEG study. *Neuroreport*. 1998;9: 2949-2952.  
629 <https://doi.org/10.1097/00001756-199809140-00006>.
- 630 35. Kuriki S, Nogai T, Hirata Y. Cortical sources of middle latency responses of auditory evoked  
631 magnetic field. *Hear Res*. 1995;92: 47-51. [https://doi.org/10.1016/0378-5955\(95\)00195-6](https://doi.org/10.1016/0378-5955(95)00195-6).
- 632 36. Virtanen J, Ahveninen J, Ilmoniemi RJ, Nääätänen R, Pekkonen E. Replicability of MEG and  
633 EEG measures of the auditory N1/N1m-response. *Electroencephalogr Clin Neurophysiol*.  
634 1998;108: 291-298. [https://doi.org/10.1016/s0168-5597\(98\)00006-9](https://doi.org/10.1016/s0168-5597(98)00006-9).
- 635 37. Iijima M, Osawa M. Excessive daytime sleepiness and the ascending reticular activating system  
636 in Parkinson's disease. *Japanese Journal of Pharmaco-EEG*. 2013;14: 29-33 (in Japanese).
- 637 38. Gittelman JX, Perkel DJ, Portfors CV. Dopamine modulates auditory responses in the inferior  
638 colliculus in a heterogeneous manner. *Assoc Res Otolaryngol*. 2013;14: 719-729.  
639 <https://doi.org/10.1007/s10162-013-0405-0>.
- 640 39. Dafny N. Selective field potential changes induced by L-DOPA. *Exp Neurol*. 1975;49: 189-202.  
641 [https://doi.org/10.1016/0014-4886\(75\)90204-6](https://doi.org/10.1016/0014-4886(75)90204-6).
- 642 40. Nagamine T, Mäkelä J, Mima T, Mikuni N, Nishitani N, Satoh T, et al. Serial processing of the  
643 somesthetic information revealed by different effects of stimulus rate on the  
644 somatosensory-evoked potentials and magnetic fields. *Brain Res*. 1998;791: 200-208.  
645 [https://doi.org/10.1016/s0006-8993\(98\)00095-x](https://doi.org/10.1016/s0006-8993(98)00095-x).

- 646 41. Valeriani M, Restuccia D, Di Lazzaro V, Le Pera D, Scerrati M, Tonali P, et al. Giant central  
647 N20-P22 with normal area 3b N20-P20: an argument in favour of an area 3a generator of early  
648 median nerve cortical SEPs? *Electroencephalogr Clin Neurophysiol.* 1997;104: 60-67.  
649 [https://doi.org/10.1016/s0168-5597\(96\)96660-5](https://doi.org/10.1016/s0168-5597(96)96660-5).
- 650 42. Desmedt JE, Bourguet M. Color imaging of parietal and frontal somatosensory potential fields  
651 evoked by stimulation of median or posterior tibial nerve in man. *Electroencephalogr Clin*  
652 *Neurophysiol.* 1985;62: 1-17. [https://doi.org/10.1016/0168-5597\(85\)90030-9](https://doi.org/10.1016/0168-5597(85)90030-9).
- 653 43. Tsutada T, Tsuyuguchi N, Hattori H, Shimogawara M, Shimada H, Miki T. The response  
654 asymmetries of the primary somatosensory cortex in Parkinson's disease. *Clin*  
655 *Electroencephalogr.* 2003;45: 277-281 (in Japanese).
- 656 44. Cheron G, Piette T, Thiriaux A, Jacquy J, Godaux E. Somatosensory evoked potentials at rest  
657 and during movement in Parkinson's disease: evidence for a specific apomorphine effect on the  
658 frontal N30 wave. *Electroencephalogr Clin Neurophysiol.* 1994;92: 491-501.  
659 [https://doi.org/10.1016/0168-5597\(94\)90133-3](https://doi.org/10.1016/0168-5597(94)90133-3).
- 660 45. Rossini PM, Bassetti MA, Pasqualetti P. Median nerve somatosensory evoked potentials.  
661 Apomorphine-induced transient potentiation of frontal components in Parkinson's disease and in  
662 parkinsonism. *Electroencephalogr Clin Neurophysiol.* 1995;96: 236-247.  
663 [https://doi.org/10.1016/0168-5597\(94\)00292-m](https://doi.org/10.1016/0168-5597(94)00292-m)

- 664 46. Tinazzi M, Fiaschi A, Idone D, Tezzon F, Zanette G. Parkinson's disease and lower limb  
665 somatosensory evoked potentials: apomorphine-induced relief of the akinetic-rigid syndrome and  
666 vertex P37-N50 potentials. *J Neurol Sci.* 1999;164: 163-171.  
667 [https://doi.org/10.1016/s0022-510x\(99\)00067-2](https://doi.org/10.1016/s0022-510x(99)00067-2).
- 668 47. Rossini PM, Filippi MM, Vernieri F. Neurophysiology of sensorimotor integration in Parkinson's  
669 disease. *Clin Neurosci.* 1998;5: 121-130.
- 670 48. Okuda B, Tachibana H, Kawabata K, Takeda M, Toda K, Sugita M. Correlation of visual evoked  
671 potentials with dementia in Parkinson's disease. *Jpn J Geriat.* 1992;29: 475-479.  
672 <https://doi.org/10.3143/geriatrics.29.475>.
- 673 49. Tachibana H, Takeda M, Sugita M, Kondo J. Parkinson's disease and Alzheimer's disease.  
674 Comparison of brainstem auditory evoked potentials. *Neurol Medicine.* 1989;31: 309-312 (in  
675 Japanese).
- 676
- 677

## 678 **Supporting information**

679 **S1 Table. Details of the medication taken by patients.** Abbreviations: <sup>1</sup>COMT,

680 catechol-*O*-methyltransferase; <sup>2</sup>LED, levodopa equivalent dose.

681 **S2 Table. Scores on the Unified Parkinson's Disease Rating Scale (UPDRS) by patients with**

682 **Parkinson's disease.** Data are given as median [Q1–Q3]. Abbreviations: <sup>1</sup>UE: upper extremity, <sup>2</sup>LE:

683 lower extremity

684 **S3 Table. Differences in individual site locations between patients with Parkinson's disease and**

685 **healthy control participants.** A comparison of the channel numbers of the sensor from which the

686 maximum root mean square peak of each evoked field was derived. Each channel was subjected to the

687 Wilcoxon signed-rank test as an order variable. Abbreviations: <sup>1</sup>VEF: visual evoked magnetic field,

688 <sup>2</sup>AEF: auditory evoked magnetic field, <sup>3</sup>SEF: somatosensory evoked field, <sup>4</sup>p: p value

689 **S4 Table. Correlation coefficients between clinical characteristics and measures, and evoked**

690 **fields.** Abbreviations: <sup>1</sup>CAT: Clinical Assessment for Attention, <sup>2</sup>ADT: auditory detection task, <sup>3</sup>SEF:

691 somatosensory evoked magnetic field, <sup>4</sup>M: mild side stimulation, <sup>5</sup>S: severe side stimulation, <sup>6</sup>VCT:

692 visual cancellation task, <sup>7</sup>VEF: visual evoked magnetic field, <sup>8</sup>AEF: auditory evoked magnetic field,

693 <sup>9</sup>i: ipsilateral side recording, <sup>10</sup>c: contralateral side recording, <sup>11</sup>UPDRS: Unified Parkinson's Disease

694 Rating Scale, <sup>12</sup>LE: lower extremity, <sup>13</sup>UE: upper extremity
